# Supplementary material
Source: Springer Nature journal article supplement (https://www.springermedizin.de/resource/supplementary/13023_2009_193_MOESM21_ESM.pdf/9641832)

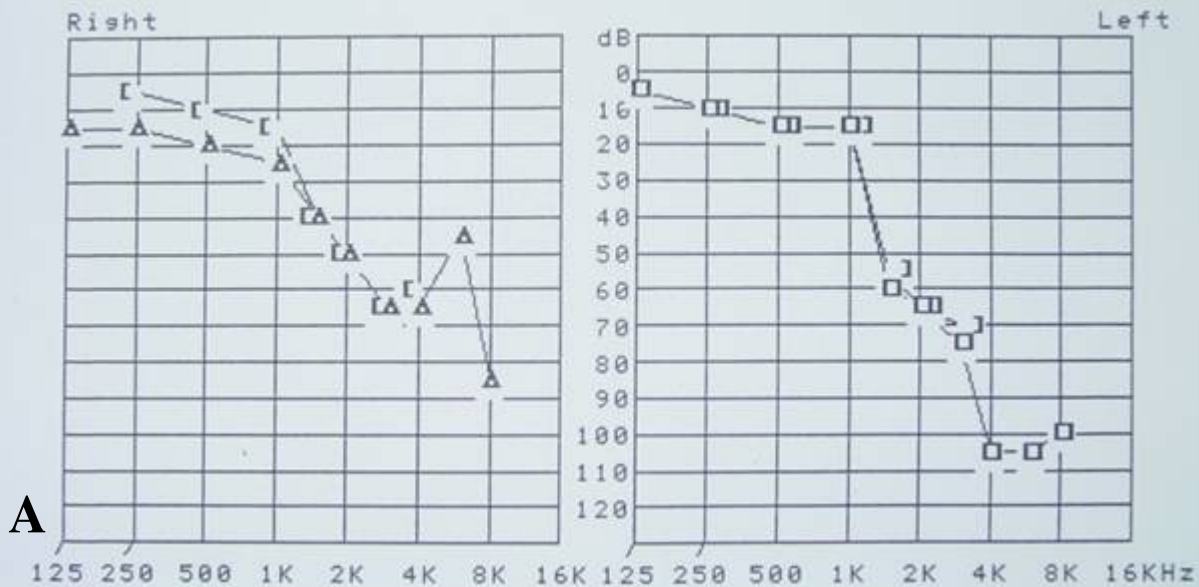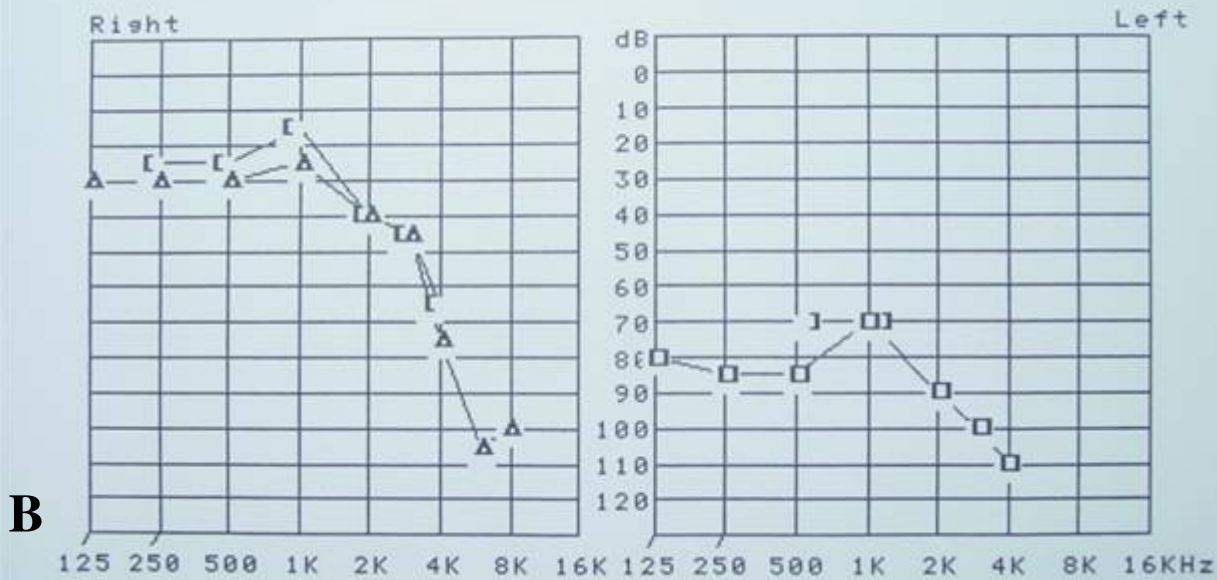

Supplement: MOESM21 [file 9641832]
